# Supplementary material for: Metformin Treatment in Patients With Type 2 Diabetes and Chronic Kidney Disease Stages 3A, 3B, or 4
Source: Oxford University Press journal article supplement (doi:10.2337/dc17-2231), 2018-01-05

SUPPLEMENTARY DATA

**Supplementary Table 1.** Baseline demographic data (mean ± SD) in the dose-finding study. The data were calculated after CKD stage reclassification (see the Methods section).

|                             | All patients<br>n = 78          | CKD 1<br>n = 17                  | CKD 2<br>n = 11                 | CKD 3A<br>n = 15                | CKD 3B<br>n = 16                | CKD 4<br>n = 13                 | CKD 5<br>n = 6                 | Comparison<br>of the<br>CKD<br>stages<br>(p-value) |
|-----------------------------|---------------------------------|----------------------------------|---------------------------------|---------------------------------|---------------------------------|---------------------------------|--------------------------------|----------------------------------------------------|
| Age, years                  | 62.1 ± 10                       | 52.4 ± 12.8                      | 63.8 ± 4.5                      | 65.1 ± 5.9                      | 66.4 ± 9.4                      | 64.3 ± 7.4                      | 63.0 ± 7.2                     | 0.011                                              |
| Gender, M/F                 | 44/35                           | 11/6                             | 5/6                             | 10/5                            | 10/6                            | 5/8                             | 2/4                            | —                                                  |
| BMI, kg/m <sup>2</sup>      | 31.5 ± 5.0                      | 30.3 ± 5.5                       | 30.8 ± 4.2                      | 33.7 ± 5.1                      | 30.8 ± 4.1                      | 33.4 ± 4.0                      | 34.8 ± 5.3                     | 0.337                                              |
| HbA1C, %<br>(mmol/mol)      | 8.8 ± 2.2<br>(73.69<br>± 24.59) | 10.6 ± 2.9<br>(92.70<br>± 33.05) | 8.8 ± 2.2<br>(73.36<br>± 24.45) | 8.2 ± 1.5<br>(65.71<br>± 16.39) | 8.8 ± 1.7<br>(72.31<br>± 18.93) | 8.1 ± 1.7<br>(64.46<br>± 18.88) | 7.7 ± 1.0<br>(62.67<br>± 9.63) | 0.040                                              |
| Blood glucose,<br>mmol/L    | 9.8 ± 4.0                       | 11.7 ± 3.8                       | 9.1 ± 3.6                       | 10.6 ± 3.5                      | 9.0 ± 3.0                       | 8.2 ± 5.8                       | 9.23 ± 3.11                    | 0.044                                              |
| Lactate, mmol/L             | 1.2 ± 0.4                       | 1.3 ± 0.5                        | 1.2 ± 0.3                       | 1.2 ± 0.4                       | 1.0 ± 0.5                       | 1.2 ± 0.3                       | 0.7 ± 0.3                      | 0.054                                              |
| eGFR, mL/min                | 57.6 ± 37.7                     | 112.6 ± 30.2                     | 78.3 ± 15.6                     | 52.7 ± 5.5                      | 36.2 ± 5.2                      | 22.9 ± 3.8                      | 15.5 ± 4.1*                    | 4.26x10 <sup>-14</sup>                             |
| Diabetes<br>duration, years | 15.4 ± 11.8                     | 2.9 ± 3.6                        | 14.4 ± 8.9                      | 17 ± 12.4                       | 21.1 ± 9.1                      | 20.1 ± 11.1                     | 20.4 ± 11.7                    | 9.13x10 <sup>-6</sup>                              |
| Study<br>completion, n      | 69                              | 15                               | 11                              | 13                              | 13                              | 12                              | 5                              | —                                                  |

\*Two patients in this group were reclassified from CKD stage 4 to stage 5, which explains the mean value of 15.5 mL/min (corresponding to the upper limit for CKD stage 5).

**Supplementary Table 2.** Laboratory data in the dose-finding study (mean ± SD (range)). Data are those retained after CKD stage reclassification\* (see the Methods section).

| CKD Stage                                                | 1                            | 2                            | 3A                                        | 3B                           | 4                                         | 5                            |
|----------------------------------------------------------|------------------------------|------------------------------|-------------------------------------------|------------------------------|-------------------------------------------|------------------------------|
| <b>Step 1<br/>(after 500<br/>mg/day for<br/>a week)</b>  |                              |                              |                                           |                              |                                           |                              |
| Number                                                   | 17                           | 11                           | 14                                        | 16                           | 12                                        | 6                            |
| eGFR, mL/min                                             | 121.2 ± 20.1<br>(90 – 150)   | 77.7 ± 9.7<br>(59 – 96)      | 55.9 ± 6<br>(41 – 65)                     | 37.8 ± 5.4<br>(30 – 47)      | 22.6 ± 4.7<br>(16 – 29)                   | 12.7 ± 1<br>(11 – 14)        |
| Blood glucose,<br>mmol/l                                 | 9.6 ± 3.4<br>(3.0 – 16.3)    | 8.8 ± 2.9<br>(5.6 – 16)      | 9.9 ± 3.3<br>(5.2 – 16)                   | 8.8 ± 2.9<br>(4.8 – 16.7)    | 8.6 ± 3.8<br>(3.9 – 16)                   | 9.0 ± 2.1<br>(6.2 – 12)      |
| Plasma metformin,<br>mg/L                                | 0.23 ± 0.11<br>(0.10 – 0.44) | 0.46 ± 0.26<br>(0.10 – 1.03) | 0.86 ± 0.54 <sup>†</sup><br>(0.10 – 2.11) | 0.97 ± 0.52<br>(0.33 – 2.0)  | 1.44 ± 1.13 <sup>‡</sup><br>(0.29 – 4.17) | 1.38 ± 0.57<br>(0.83 – 2.44) |
| Erythrocyte<br>metformin, mg/L                           | 0.23 ± 0.11<br>(0.10 – 0.57) | 0.54 ± 0.31<br>(0.12 – 1.16) | 0.65 ± 0.23<br>(0.40 – 1.09)              | 0.96 ± 0.76<br>(0.10 – 3.12) | 1.02 ± 0.64 <sup>°</sup><br>(0.46 – 2.82) | 1.43 ± 0.24<br>(0.80 – 1.38) |
| Lactate, mmol/L                                          | —                            | —                            | 1.3 ± 0.6<br>(0.62 – 2.66)                | 1.1 ± 0.4<br>(0.5 – 1.6)     | 1.2 ± 0.4<br>(0.7 – 1.97)                 | 0.7 ± 0.5<br>(0.16 – 1.7)    |
| <b>Step 2<br/>(after 1000<br/>mg/day for<br/>a week)</b> |                              |                              |                                           |                              |                                           |                              |
| Number                                                   | 17                           | 11                           | 14                                        | 15                           | 12                                        | 5                            |
| eGFR, mL/min                                             | 123.3 ± 18<br>(91 – 150)     | 78.5 ± 11.9<br>(62 – 96)     | 53.5 ± 6.2<br>(39 – 61)                   | 35.7 ± 6.3<br>(30 – 44)      | 22.3 ± 5.5<br>(11 – 32)                   | 11.8 ± 2.6<br>(8 – 15)       |
| Blood glucose,<br>mmol/l                                 | 9.2 ± 3.0<br>(4.7 – 14.4)    | 8.3 ± 3.7<br>(5.6 – 18.7)    | 8.4 ± 2.0<br>(5.5 – 12.2)                 | 9.0 ± 2.6<br>(5 – 14.6)      | 6.8 ± 3.9<br>(2 – 15.9)                   | 7.7 ± 1.0<br>(6.3 – 8.7)     |
| Plasma metformin,<br>mg/L                                | 0.50 ± 0.51<br>(0.10 – 2.18) | 0.66 ± 0.36<br>(0.32 – 1.45) | 1.09 ± 0.51<br>(0.31 – 1.82)              | 1.24 ± 0.50<br>(0.5 – 2.07)  | 2.28 ± 1.16<br>(0.89 – 4.9)               | 1.92 ± 0.95<br>(1.03 – 3.53) |
| Erythrocyte<br>metformin, mg/L                           | 0.55 ± 0.40<br>(0.10 – 1.86) | 0.76 ± 0.43<br>(0.24 – 1.84) | 0.96 ± 0.30<br>(0.59 – 1.49)              | 1.47 ± 0.68<br>(0.73 – 3.12) | 1.63 ± 0.58<br>(0.62 – 2.47)              | 1.20 ± 0.90<br>(0.10 – 2.44) |
| Lactate, mmol/L                                          | —                            | —                            | 1.3 ± 0.7<br>(0.53 – 3)                   | 1.3 ± 0.6<br>(0.54 – 2.4)    | 1.2 ± 0.4<br>(0.5 – 1.67)                 | 0.4 ± 0.2<br>(0.2 – 0.61)    |
| <b>Step 3<br/>(after 2000<br/>mg/day for<br/>a week)</b> |                              |                              |                                           |                              |                                           |                              |
| Number                                                   | 15                           | 11                           | 13                                        | 13                           | 11                                        | 5                            |
| eGFR, mL/min                                             | 121.7 ± 22.3<br>(85 – 150)   | 80.3 ± 7.5<br>(69 – 96)      | 55.3 ± 8.1<br>(42 – 76)                   | 37.3 ± 5.5<br>(30 – 45)      | 22.5 ± 3.3<br>(17 – 27)                   | 12.0 ± 1.2<br>(10 – 13)      |
| Blood glucose,<br>mmol/l                                 | 8.6 ± 3.0<br>(4.4 – 14.9)    | 7.9 ± 1.6<br>(5.1 – 10)      | 8.7 ± 2.7<br>(4.2 – 13.2)                 | 7.9 ± 1.7<br>(5.7 – 11.3)    | 7.1 ± 3.4<br>(2.7 – 14.5)                 | 9.6 ± 4.2<br>(6.7 – 16.6)    |
| Plasma metformin,<br>mg/L                                | 0.49 ± 0.30<br>(0.10 – 1.1)  | 0.84 ± 0.62<br>(0.11 – 2.0)  | 1.31 ± 0.90<br>(0.48 – 3.04)              | 2.07 ± 1.03<br>(0.76 – 4.06) | 3.09 ± 1.58<br>(1.55 – 7.2)               | 4.37 ± 1.73<br>(3.07 – 7.19) |

SUPPLEMENTARY DATA

|                             |                              |                              |                              |                              |                              |                              |
|-----------------------------|------------------------------|------------------------------|------------------------------|------------------------------|------------------------------|------------------------------|
| Erythrocyte metformin, mg/L | 0.73 ± 0.27<br>(0.10 – 1.15) | 1.19 ± 0.42<br>(0.49 – 1.88) | 1.48 ± 0.70<br>(0.83 – 3.34) | 2.32 ± 0.90<br>(0.82 – 4.18) | 2.68 ± 0.64<br>(1.61 – 3.57) | 4.54 ± 2.03<br>(1.56 – 6.74) |
| Lactate, mmol/L             | —                            | —                            | 1.4 ± 0.6<br>(0.64 – 2.45)   | 1.2 ± 0.6<br>(0.1 – 2.7)     | 1.5 ± 0.7<br>(0.74 – 2.7)    | 0.6 ± 0.1<br>(0.43 – 0.79)   |

\*The CKD stage was reclassified in 11 cases (CKD1 → CKD2: n=2; CKD2 → CKD1: n=4; CKD3B → CKD3A: n=1; CKD4 → CKD3B: n=2, and → CKD5: n=2)

**Supplementary Table 3.** Laboratory data at the end of each month during the chronic metformin treatment study (mean ± SD (range)).

| CKD Stage                   | 3A                                                               | 3B                                                               | 4                                                               |
|-----------------------------|------------------------------------------------------------------|------------------------------------------------------------------|-----------------------------------------------------------------|
| <b>1<sup>st</sup> month</b> |                                                                  |                                                                  |                                                                 |
| Number                      | 12                                                               | 12                                                               | 15                                                              |
| eGFR, mL/min                | 50.00 ± 4.22<br>(42 – 58)                                        | 34.92 ± 6.67<br>(25 – 46)                                        | 24.47 ± 5.28<br>(14 – 32)                                       |
| Blood glucose, mmol/L       | 10.03 ± 3.86<br>(4.50 – 17.50)                                   | 11.88 ± 4.12<br>(7.90 – 22.70)                                   | 10.91 ± 5.21<br>(4.40 – 24.60)                                  |
| HbA1c, %<br>[mmol/mol]      | 7.76 ± 0.94<br>(6.90 – 10.00)<br>[61.30 ± 10.26]<br>[(52 – 86)]  | 8.42 ± 2.05<br>(6.30 – 13.70)<br>[68.45 ± 22.40]<br>[(45 – 126)] | 8.07 ± 1.17<br>(6.30 – 10.20)<br>[64.54 ± 12.90]<br>[(45 – 88)] |
| Plasma metformin, mg/L      | 1.93 ± 0.75<br>(0.95 – 3.16)                                     | 1.47 ± 1.00<br>(0.23 – 3.54)                                     | 0.81 ± 0.86<br>(0.10 – 3.47)                                    |
| Erythrocyte metformin, mg/L | 1.49 ± 0.37<br>(1.02 – 2.34)                                     | 1.34 ± 0.49<br>(0.47 – 2.22)                                     | 0.83 ± 0.51<br>(0.29 – 2.27)                                    |
| Lactate, mmol/L             | 1.68 ± 0.68<br>(0.61 – 2.84)                                     | 1.48 ± 0.69<br>(0.98 – 3.37)                                     | 1.13 ± 0.61<br>(0.51 – 2.57)                                    |
| <b>2<sup>nd</sup> month</b> |                                                                  |                                                                  |                                                                 |
| Number                      | 12                                                               | 12                                                               | 15                                                              |
| eGFR, mL/min                | 50.08 ± 7.12<br>(40 – 64)                                        | 34.17 ± 7.59<br>(27 – 49)                                        | 25.00 ± 6.13<br>(13 – 37)                                       |
| Blood glucose, mmol/L       | 13.41 ± 8.68<br>(5.5 – 38.60)                                    | 11.71 ± 2.91<br>(7.60 – 16.80)                                   | 9.29 ± 3.01<br>(5.50 – 15.80)                                   |
| HbA1c, %<br>[mmol/mol]      | 7.94 ± 1.34<br>(6.50 – 10.80)<br>[63.42 ± 14.64]<br>[(48 – 95)]  | 8.33 ± 1.96<br>(6.60 – 13.60)<br>[67.54 ± 21.36]<br>[(49 – 125)] | 8.13 ± 1.18<br>(6.50 – 10.30)<br>[65.27 ± 12.81]<br>[(48 – 89)] |
| Plasma metformin, mg/L      | 1.41 ± 0.86<br>(0.10 – 2.82)                                     | 1.50 ± 0.83<br>(0.15 – 2.86)                                     | 0.75 ± 0.81<br>(0.10 – 3.13)                                    |
| Erythrocyte metformin, mg/L | 1.34 ± 0.43<br>(0.50 – 1.93)                                     | 1.41 ± 0.72<br>(0.54 – 3.26)                                     | 0.99 ± 0.50<br>(0.26 – 2.21)                                    |
| Lactate, mmol/L             | 1.56 ± 0.72<br>(0.96 – 3.34)                                     | 1.53 ± 0.68<br>(0.69 – 3.25)                                     | 1.15 ± 0.50<br>(0.65 – 2.42)                                    |
| <b>3<sup>rd</sup> month</b> |                                                                  |                                                                  |                                                                 |
| Number                      | 9                                                                | 11                                                               | 14                                                              |
| eGFR, mL/min                | 46.67 ± 5.29<br>(40 – 53)                                        | 33.45 ± 5.43<br>(27 – 44)                                        | 24.21 ± 4.58<br>(13 – 32)                                       |
| Blood glucose, mmol/L       | 12.53 ± 7.86<br>(6.20 – 32.00)                                   | 11.77 ± 5.23<br>(5.70 – 24.60)                                   | 9.68 ± 4.41<br>(5.90 – 20.20)                                   |
| HbA1c, %<br>[mmol/mol]      | 7.92 ± 1.16<br>(6.30 – 10.00)<br>[63.09 ± 12.65]<br>[(45 – 86)]  | 7.94 ± 0.91<br>(6.60 – 9.40)<br>[63.18 ± 9.85]<br>[(49 – 79)]    | 7.9 ± 1.32<br>(6.20 – 10.60)<br>[62.94 ± 14.43]<br>[(44 – 92)]  |
| Plasma metformin, mg/L      | 1.65 ± 0.68<br>(0.67 – 2.94)                                     | 1.48 ± 0.91<br>(0.23 – 2.97)                                     | 0.57 ± 0.34<br>(0.10 – 1.25)                                    |
| Erythrocyte metformin, mg/L | 1.54 ± 0.52<br>(0.82 – 2.05)                                     | 1.62 ± 0.67<br>(0.73 – 2.55)                                     | 1.00 ± 0.42<br>(0.40 – 1.74)                                    |
| Lactate, mmol/L             | 1.31 ± 0.52<br>(0.59 – 2.17)                                     | 1.44 ± 0.44<br>(0.94 – 2.17)                                     | 1.06 ± 0.62<br>(0.60 – 2.84)                                    |
| <b>4<sup>th</sup> month</b> |                                                                  |                                                                  |                                                                 |
| Number                      | 10                                                               | 11                                                               | 14                                                              |
| eGFR, mL/min                | 50.10 ± 6.24<br>(41 – 60)                                        | 34.55 ± 5.48<br>(28 – 47)                                        | 23.21 ± 5.45<br>(11 – 32)                                       |
| Blood glucose, mmol/L       | 10.79 ± 2.46<br>(7.40 – 15.50)                                   | 11.93 ± 3.92<br>(7.70 – 22.00)                                   | 10.52 ± 4.70<br>(6.20 – 22.50)                                  |
| HbA1c, %<br>[mmol/mol]      | 7.84 ± 1.47<br>(6.10 – 11.30)<br>[62.27 ± 16.31]<br>[(43 – 100)] | 7.80 ± 0.88<br>(6.60 – 9.30)<br>[61.82 ± 9.61]<br>[(49 – 78)]    | 7.87 ± 1.49<br>(6.00 – 10.90)<br>[62.36 ± 16.48]<br>[(42 – 96)] |
| Plasma metformin, mg/L      | 1.53 ± 0.83                                                      | 1.55 ± 0.75                                                      | 0.85 ± 0.77                                                     |

SUPPLEMENTARY DATA

|                             |                              |                              |                              |
|-----------------------------|------------------------------|------------------------------|------------------------------|
|                             | (0.10 – 3.21)                | (0.35 – 2.82)                | (0.10 – 2.34)                |
| Erythrocyte metformin, mg/L | 1.25 ± 0.46<br>(0.34 – 1.92) | 1.58 ± 0.48<br>(0.92 – 2.31) | 1.04 ± 0.58<br>(0.26 – 2.09) |
| Lactate, mmol/L             | 1.34 ± 0.46<br>(0.80 – 1.95) | 1.40 ± 0.28<br>(1.00 – 2.02) | 1.19 ± 0.65<br>(0.51 – 2.92) |

**Supplementary Table 4.** Details of the patients who participated in the PK study.

| Patients studied at the end of the chronic (4-month) metformin treatment study (see Methods for metformin doses) |     | Patients not having participated to the chronic metformin treatment study but with at least 1 month of metformin treatment |
|------------------------------------------------------------------------------------------------------------------|-----|----------------------------------------------------------------------------------------------------------------------------|
| CKD3A<br>n = 5                                                                                                   | n=2 | n=3<br>(1 treated with 1500 mg/d and 2 others treated with 1000 mg/d)                                                      |
| CKD3B<br>n = 5                                                                                                   | n=4 | n=1<br>(treated with 1000 mg/d)                                                                                            |
| CKD4<br>n = 5                                                                                                    | n=3 | n=2<br>(1 treated with 1000 mg/d and the other treated with 500 mg/d)                                                      |

**Supplementary Figure 1.** Flow chart indicating the patients' participation in the various studies.

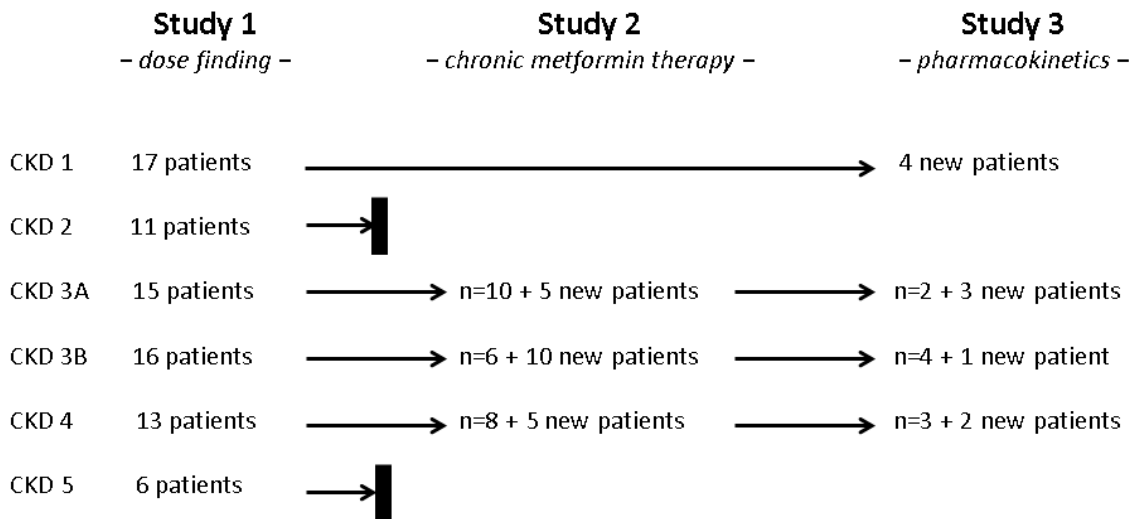

SUPPLEMENTARY DATA

Supplementary Figure 2. Patient flow chart for study 1.

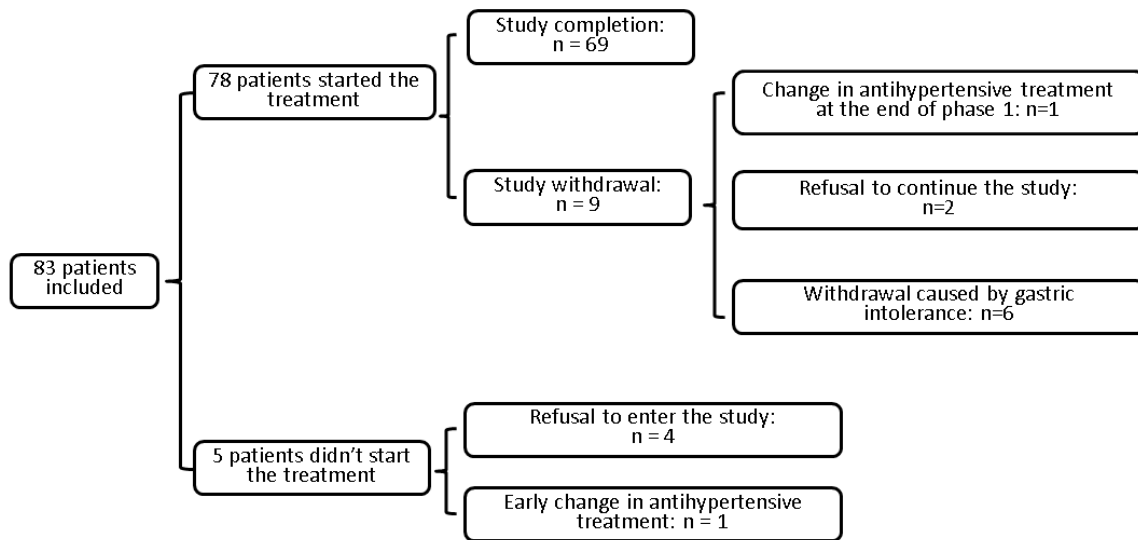

Supplementary Figure 3. Patient flow chart for study 2.

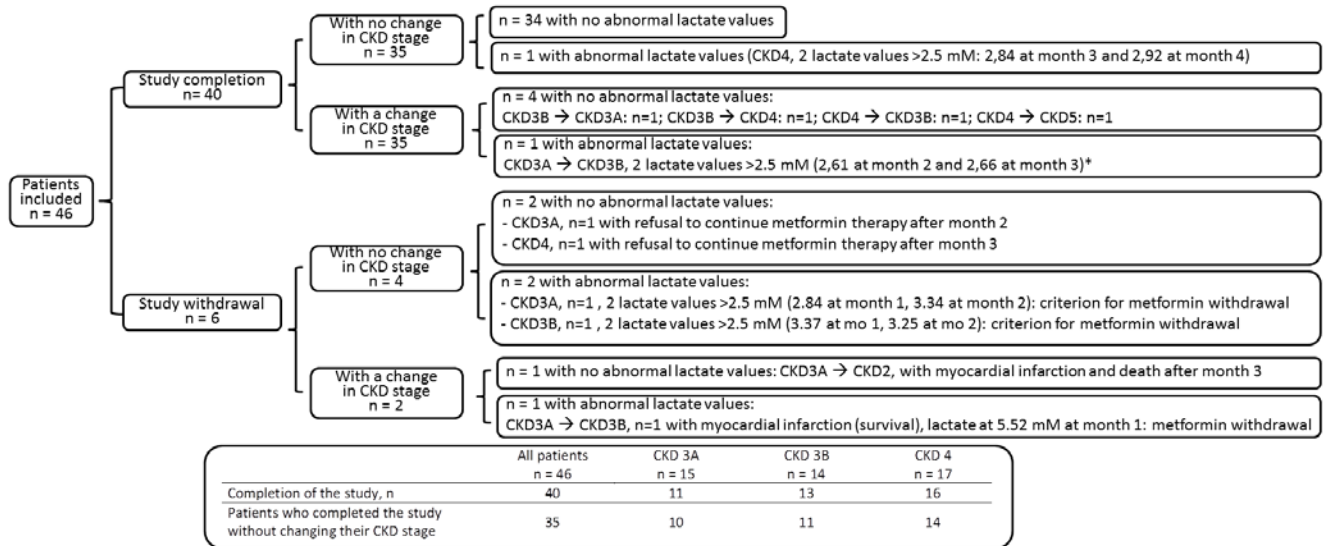

|                                                                   | All patients<br>n = 46 | CKD 3A<br>n = 15 | CKD 3B<br>n = 14 | CKD 4<br>n = 17 |
|-------------------------------------------------------------------|------------------------|------------------|------------------|-----------------|
| Completion of the study, n                                        | 40                     | 11               | 13               | 16              |
| Patients who completed the study without changing their CKD stage | 35                     | 10               | 11               | 14              |

\* i.e. criterion for metformin withdrawal. Metformin therapy was continued because (i) the increase in lactate values was small, (ii) the metformin concentrations was not abnormally elevated (1.8 mg/l), and (iii) other antidiabetic agents were not tolerated. The lactate concentration was 2.34 mM at month 4.

SUPPLEMENTARY DATA

**Supplementary Figure 4.** Time-course of metformin concentrations in plasma (top) and in erythrocytes (bottom) after the administration of a single, oral dose of 500 mg of metformin in steady-state diabetic patients with CKD 3A, 3B, and 4.

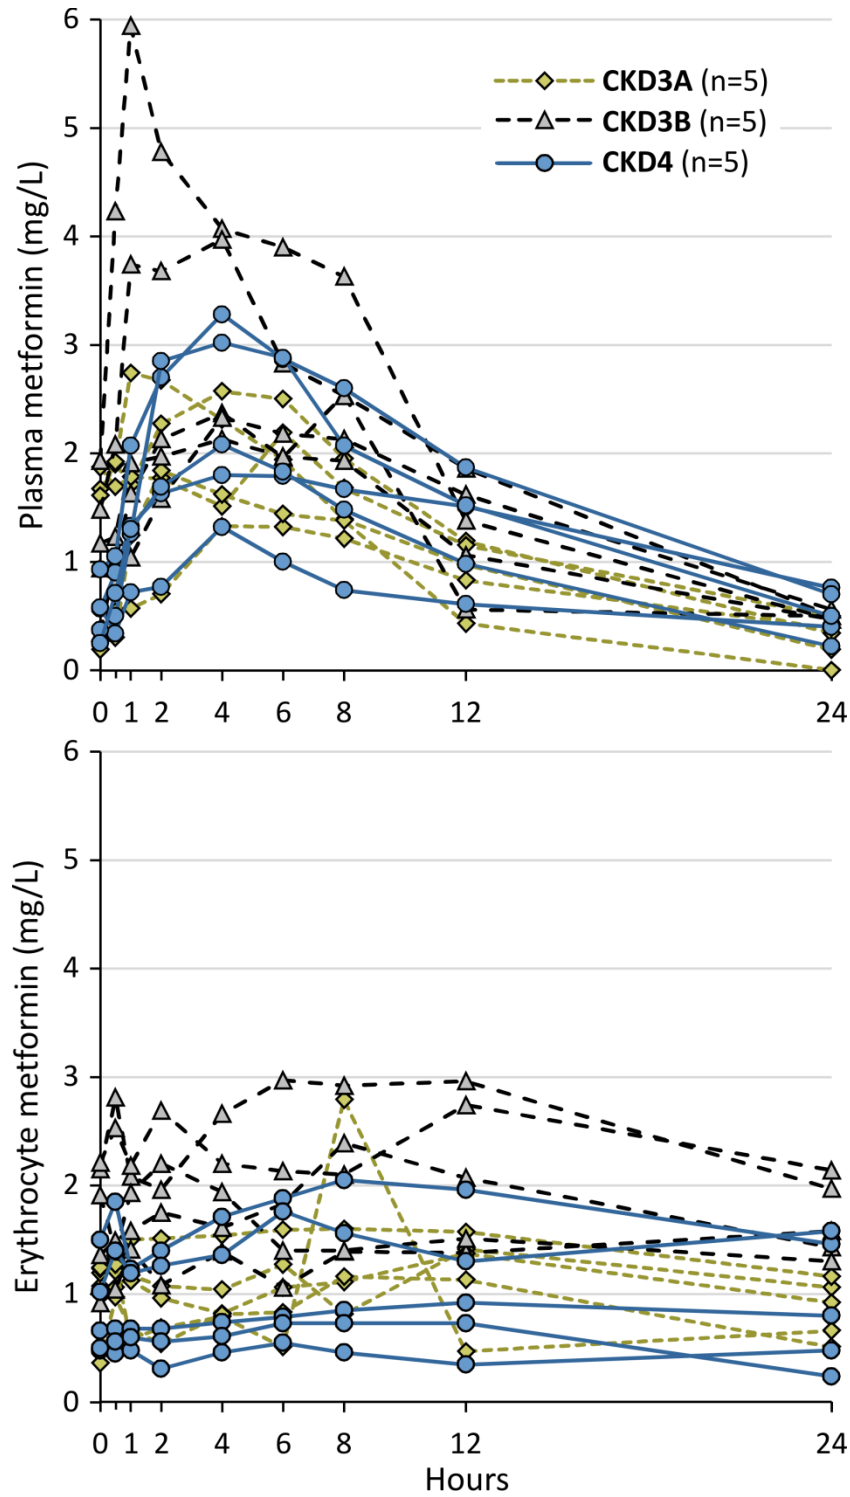

Supplement: dc172231supplementarydata.pdf [file dc172231supplementarydata.pdf]
